# Supplementary material for: Unusual particle-size-induced promoter-to-poison transition of ZrN in counter electrodes for dye-sensitized solar cells
Source: Royal Society of Chemistry journal article supplement (doi:10.1039/c3ta13002a), 2013-01-01
Supplement: c3ta13002a.pdf [file c3ta13002a.pdf]

## Supporting Information

### Unusual Particle-Size-Induced Promoter-to-Poison Transition of ZrN in Counter Electrodes for Dye-sensitized Solar Cells

Wei Wei, Hui Wang, and Yun Hang Hu\*

*Department of Materials Science and Engineering, Michigan Technological University, 1400  
Townsend Drive, Houghton, MI 49931-1295, USA.*

*\*Corresponding author: yunhangh@mtu.edu*

**1. SEM images of ZrN with ball-milling, which were obtained using a Hitachi-4700 field emission scanning electron microscope (FESEM).**

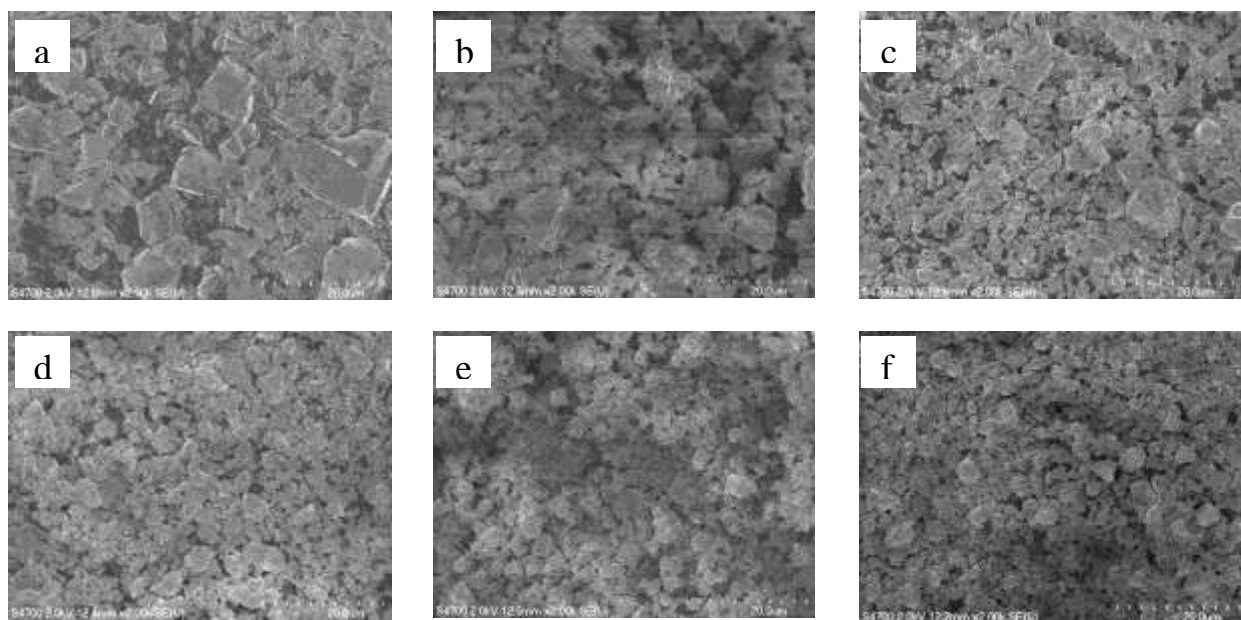

**Figure 1S.** FESEM images of: (a) ZrN without ball-milling, (b) ZrN with ball-milling for 10min, (c) ZrN with ball-milling for 30min, (d) ZrN with ball-milling for 1h, (e) ZrN with ball-milling for 5h, and (f) ZrN with ball-milling for 10h.

**2. The sizes of secondary particles of ZrN with ball-milling, which were estimated from SEM images.**

Table 1S. Secondary particle sizes of ZrN with various ball-milling times

| Ball-milling time (min) | Size range of secondary particles (nm) |
|-------------------------|----------------------------------------|
| 0                       | 1000-20000                             |
| 10                      | 500-10000                              |
| 30                      | 200-5000                               |
| 60                      | 80-3000                                |
| 300                     | 40-2000                                |
| 600                     | 20-1000                                |

*Note: The sizes of secondary particles (comprised of primary crystal particles) from SEM are much larger than corresponding primary crystal particle sizes obtained from XRD (Table 3).*
